# Supplementary material
Source: PubMed Central journal article supplement (PMC5446495)
Supplement: ajtr0009-2088-f9.pdf [file ajtr0009-2088-f9.pdf]

## MiR-101-3p in HCC

**Table S1.** Meta-analysis of miR-101 (including precursor and mature miR-101) expression and clinicopathological parameters of HCC

| Clinicopathological parameters | Number of studies | OR (95% CI)       | P     | Heterogeneity |           |        |
|--------------------------------|-------------------|-------------------|-------|---------------|-----------|--------|
|                                |                   |                   |       | $\chi^2$      | $I^2$ (%) | P      |
| Age                            | 6                 | 0.74 (0.52-1.06)  | 0.100 | 1.00          | 0.0       | 0.963  |
| Gender                         | 6                 | 0.82 (0.56-1.19)  | 0.296 | 2.25          | 0.0       | 0.814  |
| Tumor size                     | 5                 | 1.36 (0.39-4.73)  | 0.625 | 13.28         | 69.9      | 0.010  |
| Grade                          | 5                 | 0.33 (0.09-1.20)  | 0.093 | 18.34         | 78.2      | 0.001  |
| TNM stage                      | 5                 | 0.25 (0.10-0.62)  | 0.003 | 17.85         | 77.6      | 0.001  |
| AFP                            | 5                 | 0.63 (0.41-0.98)  | 0.038 | 2.04          | 0.0       | 0.729  |
| HBsAg                          | 3                 | 0.67 (0.04-11.25) | 0.780 | 10.78         | 81.4      | 0.005  |
| HBV-DNA                        | 3                 | 1.93 (0.06-59.41) | 0.706 | 16.62         | 88.0      | <0.001 |
| Cirrhosis                      | 6                 | 0.77 (0.51-1.18)  | 0.235 | 0.78          | 0.0       | 0.978  |
